# Supplementary material
Source: MDPI journal article supplement (https://www.mdpi.com/2073-4441/13/16/2234)
Supplement: s1 [file s1]

# **PREVALENCE OF ANTIBIOTIC RESISTANT GENES IN THE SAIGON RIVER IMPACTED BY ANTHROPOGENIC ACTIVITIES**

Truong Thong<sup>1,3</sup>, Hoang Thai Loc<sup>4</sup>, Tran Linh Thuoc<sup>1,3</sup>, Pham Thi Phuong Thuy<sup>5</sup>, Le Thai-  
Hoang<sup>2,3,6\*</sup>

<sup>1</sup>Faculty of Biology and Biotechnology, University of Science, Ho Chi Minh City, Vietnam

<sup>2</sup>Department of Environmental Engineering, International University, Ho Chi Minh City,  
Vietnam

<sup>3</sup>Vietnam National University, Ho Chi Minh City, Vietnam

<sup>4</sup>Vietnam Petroleum Institute - Research and Development Centre for Petroleum Safety and  
Environment, Vietnam

<sup>5</sup>Faculty of Biotechnology, Ho Chi Minh City University of Food and Industry, Vietnam

<sup>6</sup>Faculty of Environmental and Food Engineering, Nguyen Tat Thanh University, Ho Chi Minh  
City, Vietnam

\*Corresponding author: Dr. Le Thai-Hoang, <sup>2,3</sup>Vietnam National University Ho Chi Minh City,  
International University, Department of Environmental Engineering, Ho Chi Minh City,  
Vietnam; <sup>6</sup>Nguyen Tat Thanh University, Faculty of Environmental and Food Engineering, Ho  
Chi Minh City, Viet Nam; Email: [lthoang.bio@gmail.com](mailto:lthoang.bio@gmail.com), ORCID: 0000-0002-2508-1260

## SUPPLEMENTARY MATERIALS

FIGURE S1. MAP OF ALL THE SAMPLING SITES ALONG THE SAIGON RIVER IN HO CHI MINH CITY ..3

|                                                                                                                                                                                                                                                                                                                                                                |    |
|----------------------------------------------------------------------------------------------------------------------------------------------------------------------------------------------------------------------------------------------------------------------------------------------------------------------------------------------------------------|----|
| TABLE S1. DETAILED INFORMATION OF RT-PCR PRIMERS FOR QUANTIFICATION OF THE ARGS, INTEGRONS, AND 16S RRNA GENE .....                                                                                                                                                                                                                                            | 4  |
| TABLE S2. LIMIT OF DETECTION VALUES FOR ALL TARGET ARGS IN QPCR .....                                                                                                                                                                                                                                                                                          | 5  |
| TABLE S3. THE CONCENTRATION (COPIES/ML) OF THE ARGS, INTEGRONS, AND 16S RRNA GENE IN THE 12 SAMPLING SITES OF THE SAIGON RIVER INFLUENCED BY DIFFERENT ANTHROPOGENIC ACTIVITIES SUCH AS LESS-IMPACTED AREAS (L), AGRICULTURAL (A), INDUSTRIAL (I), AND RESIDENTIAL (R) ACTIVITIES DURING THE WET AND DRY SEASONS. <LOD: LESS THAN THE LIMIT OF DETECTION. .... | 6  |
| TABLE S4. THE RELATIVE ABUNDANCE OF THE ARGS, AND INTEGRONS IN THE 12 SAMPLING SITES OF THE SAIGON RIVER INFLUENCED BY DIFFERENT ANTHROPOGENIC ACTIVITIES SUCH AS LESS-IMPACTED AREAS (L), AGRICULTURAL (A), INDUSTRIAL (I), AND RESIDENTIAL (R) ACTIVITIES DURING THE WET AND DRY SEASONS. NA: NOT AVAILABLE .....                                            | 8  |
| TABLE S5. THE CORRELATION COEFFICIENT VALUES OF PEARSON AND SPEARMAN ANALYSIS BETWEEN WATER QUALITY PARAMETERS AND THE ABSOLUTE ABUNDANCE (COPIES/ML) OF ALL ARGS, INTEGRONS, AND THE 16S RRNA GENE IN THE SURFACE WATER. THE CORRELATION WAS CONSIDERED SIGNIFICANT ONLY IF THE P-VALUE WAS LESS THAN 0.05, AND HIGHLIGHTED WITH BOLD FORMAT. ....            | 9  |
| TABLE S6. THE P VALUE OF PEARSON AND SPEARMAN ANALYSIS BETWEEN WATER QUALITY PARAMETERS AND ARGS, INTEGRONS, AND THE 16S RRNA GENE IN THE SURFACE WATER...                                                                                                                                                                                                     | 10 |

## SUPPLEMENTARY MATERIALS

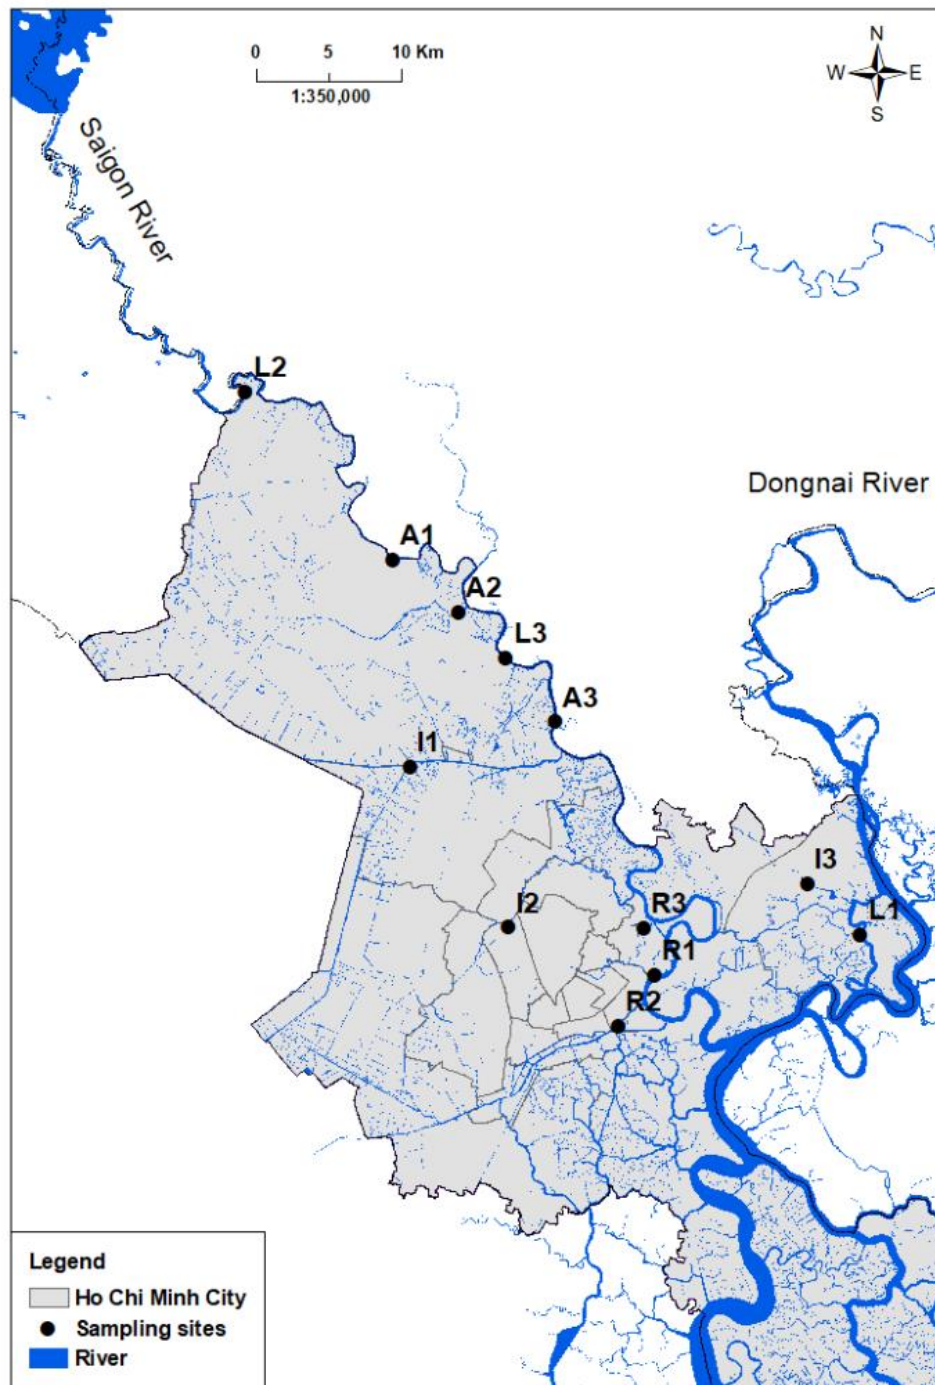

Figure S1. Map of all the sampling sites along the Saigon River in Ho Chi Minh City

Table S1. Detailed information of RT-PCR primers for quantification of the ARGs, integrons, and 16S rRNA gene

| Target genes               | Amplicon length (bp) | Description                    | The sequences of forward and reverse primers                   | Annealing temp. (°C) | References                                   |
|----------------------------|----------------------|--------------------------------|----------------------------------------------------------------|----------------------|----------------------------------------------|
| <i>aac(6)-Ib-cr</i>        | 179                  | Aminoglycoside resistance gene | F: GGAGAGCCGATTGGGTATG<br>R: CATGTACACGGCTGGACCA               | 60                   | (Guillard <i>et al.</i> , 2010)              |
| <i>bla<sub>CTX-M</sub></i> | 232                  | B-lactam resistance gene       | F: GGAATCTGACGCTGGGTAAA<br>R: GGTTGAGGCTGGGTGAAGTA             | 56                   | (Ellem, Partridge and Iredell, 2011)         |
| <i>bla<sub>SHV</sub></i>   | 105                  | B-lactam resistance gene       | F: TCCCATGATGAGCACCTTTAAA<br>R: TCCTGCTGGCGATAGTGGAT           | 55                   | (Roschanski <i>et al.</i> , 2014)            |
| <i>bla<sub>TEM</sub></i>   | 100                  | B-lactam resistance gene       | F: GCATCTTACGGATGGCATGA<br>R: GTCCTCCGATCGTTGTCAGAA            | 61                   | (Roschanski <i>et al.</i> , 2014)            |
| <i>qnrA</i>                | 159                  | Quinolone resistance gene      | F: ATTTCTCACGCCAGGATTG<br>R: GCAGATCGGCATAGCTGAAG              | 56                   | (Marti and Balcázar, 2013)                   |
| <i>qnrB</i>                | 193                  | Quinolone resistance gene      | F: TATGGCTCTGGCACTCGTT<br>R: GCATCTTTCAGCATCGCAC               | 56                   | (Hamed <i>et al.</i> , 2018)                 |
| <i>oqxB</i>                | 131                  | Efflux pump                    | F: TCCTGATCTCCATTAACGCCCA<br>R: ACCGGAACCCATCTCGATGC           | 56                   | (Hong <i>et al.</i> , 2009)                  |
| <i>sul1</i>                | 163                  | Sulfonamide resistance gene    | F: CGCACCAGAAACATCGCTGCAC<br>R: TGAAGTTCGCGCGCAAGGCTCG         | 60                   | (Pei <i>et al.</i> , 2006)                   |
| <i>sul2</i>                | 191                  | Sulfonamide resistance gene    | F: TCCGGTGGAGGCCGGTATCTGG<br>R: CGGGAATGCCATCTGCCTTGAG         | 60                   | (Pei <i>et al.</i> , 2006)                   |
| <i>dfrA</i>                | 273                  | Trimethoprim resistance gene   | F: ACGGATCCTGGCTGTTGGTTGGACGC<br>R: CGGAATTCACCTTCCGGCTCGATGTC | 60                   | (Lee <i>et al.</i> , 2001)                   |
| <i>intI1</i>               | 196                  | Integrase class 1              | F: GCCTTGATGTTACCCGAGAG<br>R: GATCGGTCTGAATGCGTGT              | 58                   | (Barraud <i>et al.</i> , 2010)               |
| <i>intI2</i>               | 195                  | Integrase class 2              | F: TGCTTTTCCCACCTTACC<br>R: GACGGCTACCCTCTGTTATCTC             | 58                   | (Barraud <i>et al.</i> , 2010)               |
| <i>intI3</i> -             | 138                  | Integrase class 3              | F: GCCACCACTTGTGAGGA<br>R: GGATGTCTGTGCCTGCTTG                 | 58                   | (Barraud <i>et al.</i> , 2010)               |
| <i>16S rRNA</i>            | 136                  | Total bacterial 16S rRNA gene  | F: AAACCTCAAAGAATTGACGG<br>R: CTCACRRCACGAGCTGAC               | 59                   | (Bacchetti De Gregoris <i>et al.</i> , 2011) |

Table S2. Limit of detection values for all target ARGs in qPCR

| Antibiotic resistance genes | Limit of detection<br>(gene copies) |
|-----------------------------|-------------------------------------|
| <i>aac(6)-Ib-cr</i>         | 52                                  |
| <i>blaCTX-M</i>             | 40                                  |
| <i>blaTEM</i>               | 93                                  |
| <i>blaSHV</i>               | 88                                  |
| <i>qnrA</i>                 | 58                                  |
| <i>qnrB</i>                 | 48                                  |
| <i>sul1</i>                 | 49                                  |
| <i>sul2</i>                 | 57                                  |
| <i>dfrA</i>                 | 39                                  |
| <i>oqxB</i>                 | 71                                  |
| <i>intI1</i>                | 47                                  |
| <i>intI2</i>                | 47                                  |
| <i>intI3</i>                | 67                                  |
| <i>16S rRNA</i>             | 68                                  |

Table S3. The concentration (copies/mL) of the ARGs, Integrons, and 16S rRNA gene in the 12 sampling sites of the Saigon River influenced by different anthropogenic activities such as less-impacted areas (L), agricultural (A), industrial (I), and residential (R) activities during the wet and dry seasons. <LOD: Less than the limit of detection.

| Seasons    | Sites | <i>aac(6)-Ib-cr</i> | <i>blaCTX</i> | <i>blaTEM</i> | <i>blaSHV</i> | <i>qnrA</i> | <i>qnrB</i> | <i>sulI</i> | <i>sul2</i> | <i>dfrA</i> | <i>intI1</i> | <i>intI2</i> | <i>intI3</i> | <i>oqxB</i> | <i>16S rRNA</i> |
|------------|-------|---------------------|---------------|---------------|---------------|-------------|-------------|-------------|-------------|-------------|--------------|--------------|--------------|-------------|-----------------|
| Wet season | L1    | 1.9E+02             | 3.7E+00       | 1.0E+03       | 9.1E+02       | 8.8E+01     | 9.5E+01     | 2.5E+04     | 3.5E+03     | 8.8E+02     | 2.5E+04      | 2.7E+01      | 6.5E+02      | 5.0E+02     | 5.1E+05         |
|            | L2    | <LOD                | 6.3E+00       | 3.3E+02       | 4.0E+02       | 7.4E+01     | 6.3E+00     | 1.5E+03     | 8.5E+01     | 2.7E+02     | 1.6E+03      | 2.9E+00      | 3.4E+00      | 5.3E+01     | 7.3E+04         |
|            | L3    | 1.9E+02             | 2.5E+00       | 5.3E+02       | 1.4E+01       | 7.9E+01     | 8.2E+01     | 1.5E+04     | 1.8E+03     | 5.7E+02     | 2.0E+04      | 2.7E+01      | 3.4E+02      | 2.5E+02     | 6.2E+05         |
|            | A1    | 2.4E+02             | 7.2E-03       | 2.4E+02       | 1.7E+02       | 1.2E+02     | 6.7E+01     | 1.2E+04     | 1.4E+03     | 1.2E+03     | 1.2E+04      | 1.6E+01      | 5.2E+02      | 1.8E+02     | 7.0E+05         |
|            | A2    | 4.6E+02             | 6.3E-01       | 4.6E+02       | 1.8E+04       | 2.7E+02     | 1.2E+02     | 3.7E+04     | 7.3E+03     | 2.1E+03     | 3.6E+04      | 7.8E+01      | 2.5E+03      | 2.2E+02     | 2.2E+06         |
|            | A3    | 1.5E+02             | 2.9E-02       | 2.2E+02       | 8.0E+02       | 1.2E+02     | 2.7E+02     | 1.9E+04     | 2.4E+03     | 4.0E+02     | 1.8E+04      | 3.5E+01      | 3.1E+02      | 2.3E+02     | 9.4E+05         |
|            | I1    | 2.4E+02             | 4.3E+00       | 6.9E+02       | 2.2E+02       | 2.8E+02     | 1.3E+02     | 2.0E+04     | 1.9E+03     | 3.7E+02     | 2.2E+04      | 4.2E+01      | 4.2E+02      | 3.3E+02     | 8.1E+05         |
|            | I2    | 5.8E+05             | 1.3E+03       | 6.8E+05       | 9.6E+03       | 7.9E+04     | 3.4E+03     | 6.4E+06     | 4.6E+05     | 2.9E+05     | 1.1E+07      | 1.0E+04      | 6.5E+04      | 2.2E+05     | 1.1E+08         |
|            | I3    | 1.6E+06             | 9.5E+02       | 6.7E+05       | 1.5E+04       | 1.6E+05     | 2.2E+03     | 8.9E+06     | 8.7E+05     | 4.9E+05     | 1.9E+07      | 3.5E+04      | 1.9E+05      | 2.9E+05     | 1.6E+08         |
|            | R1    | 6.0E+03             | 5.4E+01       | 5.0E+03       | 6.3E+01       | 5.7E+02     | 2.0E+03     | 1.3E+05     | 2.1E+04     | 3.8E+03     | 1.8E+05      | 1.0E+02      | 1.6E+03      | 3.0E+03     | 1.2E+07         |
|            | R2    | 1.2E+05             | 3.6E+02       | 1.5E+05       | 6.0E+02       | 1.2E+04     | 2.5E+03     | 1.7E+06     | 4.3E+05     | 5.2E+04     | 3.1E+06      | 2.7E+02      | 3.8E+04      | 5.8E+04     | 7.8E+07         |
|            | R3    | 5.5E+05             | 8.9E+02       | 3.3E+05       | 2.0E+02       | 3.3E+04     | 2.2E+04     | 4.8E+06     | 3.6E+05     | 1.9E+05     | 7.3E+06      | 5.5E+03      | 6.7E+04      | 1.1E+05     | 9.4E+07         |
| Dry season | L1    | 5.7E+02             | 4.3E+01       | 8.8E+02       | 6.7E+03       | 3.9E+02     | 3.7E+01     | 3.4E+02     | 5.7E+03     | 1.3E+03     | 1.6E+03      | 2.3E+02      | 4.4E+02      | 8.0E+02     | 3.3E+04         |
|            | L2    | 8.1E+01             | 8.0E+00       | 8.3E+02       | 1.8E+03       | 6.2E+02     | 1.4E+02     | 1.1E+03     | 4.4E+03     | 2.7E+03     | 1.5E+03      | 2.4E+02      | 2.2E+02      | 9.8E+02     | 2.6E+06         |
|            | L3    | 2.8E+03             | 4.7E+00       | 1.6E+03       | 4.9E+02       | 1.7E+02     | 1.0E+01     | 2.7E+04     | 3.1E+05     | 2.0E+04     | 3.2E+04      | 2.2E+01      | 3.8E+02      | 1.7E+03     | 1.6E+04         |
|            | A1    | 1.5E+03             | 5.8E+01       | 5.1E+04       | 6.3E+03       | 9.9E+02     | 1.3E+02     | 1.8E+04     | 6.8E+04     | 1.3E+04     | 1.5E+04      | 2.6E+02      | 3.4E+02      | 7.5E+02     | 3.7E+05         |
|            | A2    | 1.4E+04             | 2.6E+02       | 1.6E+03       | 1.7E+04       | 2.5E+03     | 1.1E+02     | 1.0E+05     | 3.7E+05     | 9.1E+04     | 7.3E+04      | 2.3E+02      | 1.5E+03      | 1.6E+03     | 1.3E+06         |
|            | A3    | 1.1E+04             | 6.4E+02       | 9.6E+03       | 6.2E+03       | 2.4E+03     | 3.5E+03     | 1.8E+05     | 7.0E+05     | 6.2E+04     | 2.2E+05      | 2.7E+02      | 4.8E+03      | 4.5E+03     | 2.4E+06         |
|            | I1    | 2.1E+04             | 7.1E+02       | 2.7E+03       | 9.1E+03       | 8.8E+03     | 8.6E+02     | 4.1E+05     | 1.3E+06     | 1.1E+05     | 2.6E+05      | 3.0E+02      | 2.0E+03      | 5.5E+03     | 5.3E+06         |
|            | I2    | 1.5E+07             | 2.0E+04       | 1.2E+07       | 1.4E+05       | 2.6E+05     | 5.3E+03     | 4.4E+07     | 3.8E+07     | 5.6E+06     | 2.7E+07      | 1.8E+04      | 1.6E+05      | 4.6E+05     | 1.6E+08         |
|            | I3    | 5.7E+06             | 8.7E+03       | 2.9E+06       | 8.1E+04       | 1.2E+05     | 2.7E+03     | 1.5E+07     | 1.0E+07     | 2.1E+06     | 1.3E+07      | 7.9E+03      | 5.1E+04      | 2.1E+05     | 6.2E+07         |
|            | R1    | 7.7E+03             | 1.4E+02       | 8.2E+03       | 1.5E+03       | 1.9E+02     | 7.1E+03     | 4.6E+04     | 2.2E+05     | 7.9E+03     | 6.1E+04      | 5.1E+01      | 9.8E+02      | 1.6E+03     | 1.1E+06         |
|            | R2    | 9.5E+05             | 2.9E+03       | 1.0E+06       | 6.3E+04       | 1.2E+04     | 4.2E+03     | 3.9E+06     | 9.7E+06     | 5.5E+05     | 3.3E+06      | 2.0E+03      | 4.7E+04      | 8.0E+04     | 1.8E+07         |
|            | R3    | 2.7E+06             | 7.8E+03       | 1.9E+06       | 2.9E+05       | 4.4E+04     | 2.8E+04     | 2.1E+07     | 2.2E+07     | 1.1E+06     | 1.1E+07      | 6.5E+03      | 1.3E+05      | 2.3E+05     | 5.8E+07         |
| Average    | L     | 6.2E+02             | 1.1E+01       | 8.6E+02       | 1.7E+03       | 2.4E+02     | 6.2E+01     | 1.2E+04     | 5.5E+04     | 4.4E+03     | 1.4E+04      | 9.2E+01      | 3.4E+02      | 7.1E+02     | 6.3E+05         |
|            | A     | 4.6E+03             | 1.6E+02       | 1.1E+04       | 8.0E+03       | 1.1E+03     | 7.0E+02     | 6.2E+04     | 1.9E+05     | 2.8E+04     | 6.1E+04      | 1.5E+02      | 1.7E+03      | 1.3E+03     | 1.3E+06         |

|  |   |         |         |         |         |         |         |         |         |         |         |         |         |         |         |
|--|---|---------|---------|---------|---------|---------|---------|---------|---------|---------|---------|---------|---------|---------|---------|
|  | I | 3.8E+06 | 5.2E+03 | 2.7E+06 | 4.2E+04 | 1.1E+05 | 2.4E+03 | 1.2E+07 | 8.5E+06 | 1.4E+06 | 1.2E+07 | 1.2E+04 | 7.9E+04 | 2.0E+05 | 8.4E+07 |
|  | R | 7.3E+05 | 2.0E+03 | 5.7E+05 | 6.0E+04 | 1.7E+04 | 1.1E+04 | 5.2E+06 | 5.5E+06 | 3.1E+05 | 4.2E+06 | 2.4E+03 | 4.7E+04 | 8.1E+04 | 4.3E+07 |

Table S4. The relative abundance of the ARGs, and Integrons in the 12 sampling sites of the Saigon River influenced by different anthropogenic activities such as less-impacted areas (L), agricultural (A), industrial (I), and residential (R) activities during the wet and dry seasons. NA: not available

| Seasons    | Sites | <i>aac(6)-Ib-cr</i> | <i>blaCTX</i> | <i>blaTEM</i> | <i>blaSHV</i> | <i>qnrA</i> | <i>qnrB</i> | <i>sul1</i> | <i>sul2</i> | <i>dfrA</i> | <i>intI1</i> | <i>intI2</i> | <i>intI3</i> | <i>oqxB</i> |
|------------|-------|---------------------|---------------|---------------|---------------|-------------|-------------|-------------|-------------|-------------|--------------|--------------|--------------|-------------|
| Wet season | L1    | 3.6E-04             | 7.2E-06       | 2.0E-03       | 1.8E-03       | 1.7E-04     | 1.8E-04     | 4.9E-02     | 6.8E-03     | 1.7E-03     | 4.9E-02      | 5.2E-05      | 1.3E-03      | 9.7E-04     |
|            | L2    | NA                  | 8.6E-05       | 4.6E-03       | 5.4E-03       | 1.0E-03     | 8.6E-05     | 2.0E-02     | 1.2E-03     | 3.7E-03     | 2.2E-02      | 3.9E-05      | 4.7E-05      | 7.3E-04     |
|            | L3    | 3.1E-04             | 4.1E-06       | 8.5E-04       | 2.3E-07       | 1.3E-04     | 1.3E-04     | 2.5E-02     | 2.9E-03     | 9.2E-04     | 3.2E-02      | 4.3E-05      | 5.5E-04      | 4.0E-04     |
|            | I1    | 3.0E-04             | 5.3E-06       | 8.5E-04       | 2.8E-04       | 3.4E-04     | 1.6E-04     | 2.5E-02     | 2.3E-03     | 4.6E-04     | 2.8E-02      | 5.2E-05      | 5.3E-04      | 4.1E-04     |
|            | I2    | 5.2E-03             | 1.2E-05       | 6.1E-03       | 8.6E-05       | 7.1E-04     | 3.0E-05     | 5.8E-02     | 4.2E-03     | 2.6E-03     | 9.7E-02      | 9.4E-05      | 5.8E-04      | 2.0E-03     |
|            | I3    | 9.6E-03             | 5.8E-06       | 4.1E-03       | 9.1E-05       | 9.9E-04     | 1.3E-05     | 5.4E-02     | 5.3E-03     | 3.0E-03     | 1.2E-01      | 2.1E-04      | 1.2E-03      | 1.8E-03     |
|            | A1    | 3.4E-04             | 1.0E-08       | 3.5E-04       | 2.5E-04       | 1.7E-04     | 9.7E-05     | 1.7E-02     | 2.0E-03     | 1.8E-03     | 1.7E-02      | 2.3E-05      | 7.5E-04      | 2.6E-04     |
|            | A2    | 2.1E-04             | 2.9E-07       | 2.1E-04       | 8.2E-03       | 1.3E-04     | 5.8E-05     | 1.7E-02     | 3.4E-03     | 9.8E-04     | 1.7E-02      | 3.6E-05      | 1.2E-03      | 1.0E-04     |
|            | A3    | 1.6E-04             | 3.0E-08       | 2.3E-04       | 8.5E-04       | 1.3E-04     | 2.9E-04     | 2.0E-02     | 2.6E-03     | 4.2E-04     | 1.9E-02      | 3.7E-05      | 3.3E-04      | 2.5E-04     |
|            | R1    | 4.9E-04             | 4.4E-06       | 4.1E-04       | 5.2E-06       | 4.7E-05     | 1.7E-04     | 1.1E-02     | 1.7E-03     | 3.1E-04     | 1.5E-02      | 8.6E-06      | 1.3E-04      | 2.4E-04     |
|            | R2    | 1.6E-03             | 4.6E-06       | 1.9E-03       | 7.7E-06       | 1.6E-04     | 3.2E-05     | 2.1E-02     | 5.5E-03     | 6.6E-04     | 3.9E-02      | 3.4E-06      | 4.9E-04      | 7.3E-04     |
|            | R3    | 5.9E-03             | 9.5E-06       | 3.5E-03       | 2.2E-06       | 3.5E-04     | 2.3E-04     | 5.1E-02     | 3.8E-03     | 2.1E-03     | 7.8E-02      | 5.9E-05      | 7.2E-04      | 1.2E-03     |
| Dry season | L1    | 1.7E-02             | 1.3E-03       | 2.7E-02       | 2.0E-01       | 1.2E-02     | 1.1E-03     | 1.0E-02     | 1.7E-01     | 4.0E-02     | 4.8E-02      | 7.1E-03      | 1.3E-02      | 2.4E-02     |
|            | L2    | 3.2E-05             | 3.2E-06       | 3.2E-04       | 6.9E-04       | 2.4E-04     | 5.6E-05     | 4.4E-04     | 1.7E-03     | 1.1E-03     | 5.7E-04      | 9.5E-05      | 8.7E-05      | 3.8E-04     |
|            | L3    | 1.7E-01             | 2.9E-04       | 9.7E-02       | 3.0E-02       | 1.0E-02     | 6.1E-04     | 1.7E+00     | 1.9E+01     | 1.2E+00     | 1.9E+00      | 1.4E-03      | 2.3E-02      | 1.0E-01     |
|            | I1    | 4.0E-03             | 1.3E-04       | 5.0E-04       | 1.7E-03       | 1.7E-03     | 1.6E-04     | 7.7E-02     | 2.4E-01     | 2.1E-02     | 4.9E-02      | 5.6E-05      | 3.8E-04      | 1.0E-03     |
|            | I2    | 9.4E-02             | 1.2E-04       | 7.3E-02       | 8.7E-04       | 1.6E-03     | 3.3E-05     | 2.7E-01     | 2.4E-01     | 3.5E-02     | 1.7E-01      | 1.1E-04      | 1.0E-03      | 2.8E-03     |
|            | I3    | 9.1E-02             | 1.4E-04       | 4.7E-02       | 1.3E-03       | 2.0E-03     | 4.4E-05     | 2.4E-01     | 1.7E-01     | 3.3E-02     | 2.1E-01      | 1.3E-04      | 8.2E-04      | 3.4E-03     |
|            | A1    | 4.1E-03             | 1.6E-04       | 1.4E-01       | 1.7E-02       | 2.7E-03     | 3.7E-04     | 5.0E-02     | 1.9E-01     | 3.5E-02     | 4.1E-02      | 7.1E-04      | 9.3E-04      | 2.1E-03     |
|            | A2    | 1.0E-02             | 1.9E-04       | 1.2E-03       | 1.2E-02       | 1.8E-03     | 7.9E-05     | 7.8E-02     | 2.8E-01     | 6.8E-02     | 5.5E-02      | 1.7E-04      | 1.1E-03      | 1.2E-03     |
|            | A3    | 4.7E-03             | 2.6E-04       | 3.9E-03       | 2.6E-03       | 9.7E-04     | 1.4E-03     | 7.5E-02     | 2.9E-01     | 2.5E-02     | 8.9E-02      | 1.1E-04      | 2.0E-03      | 1.8E-03     |
|            | R1    | 6.7E-03             | 1.2E-04       | 7.1E-03       | 1.3E-03       | 1.6E-04     | 6.2E-03     | 4.0E-02     | 1.9E-01     | 6.9E-03     | 5.3E-02      | 4.5E-05      | 8.5E-04      | 1.4E-03     |
|            | R2    | 5.2E-02             | 1.6E-04       | 5.7E-02       | 3.5E-03       | 6.9E-04     | 2.3E-04     | 2.2E-01     | 5.3E-01     | 3.0E-02     | 1.8E-01      | 1.1E-04      | 2.6E-03      | 4.4E-03     |
|            | R3    | 4.7E-02             | 1.4E-04       | 3.3E-02       | 5.1E-03       | 7.7E-04     | 4.8E-04     | 3.6E-01     | 3.8E-01     | 1.8E-02     | 1.9E-01      | 1.1E-04      | 2.2E-03      | 4.1E-03     |



Table S5. The correlation coefficient values of Pearson and Spearman analysis between water quality parameters and the absolute abundance (copies/ml) of all ARGs, integrons, and the 16S rRNA gene in the surface water. The correlation was considered significant only if the p-value was less than 0.05, and highlighted with bold format.

|                     |          | pH           | Temperature  | Conductivity | Salinity     | Turbidity | DO            | P-PO43-      | N-NH4+       | N-NO2-        | N-NO3-        | BOD5         |
|---------------------|----------|--------------|--------------|--------------|--------------|-----------|---------------|--------------|--------------|---------------|---------------|--------------|
| <i>aac(6)-Ib-cr</i> | Pearson  | <b>0.448</b> | <b>0.449</b> | 0.025        | 0.061        | 0.205     | <b>-0.433</b> | 0.153        | 0.013        | -0.157        | -0.074        | <b>0.582</b> |
|                     | Spearman | <b>0.645</b> | <b>0.524</b> | <b>0.777</b> | <b>0.787</b> | -0.071    | <b>-0.409</b> | <b>0.526</b> | <b>0.461</b> | <b>-0.429</b> | -0.328        | <b>0.783</b> |
| <i>blaCTX</i>       | Pearson  | <b>0.491</b> | <b>0.489</b> | 0.113        | 0.159        | 0.210     | <b>-0.441</b> | 0.208        | 0.057        | -0.168        | -0.092        | <b>0.581</b> |
|                     | Spearman | <b>0.648</b> | <b>0.502</b> | <b>0.754</b> | <b>0.766</b> | -0.161    | -0.295        | <b>0.456</b> | <b>0.451</b> | <b>-0.512</b> | <b>-0.473</b> | <b>0.752</b> |
| <i>blaTEM</i>       | Pearson  | <b>0.438</b> | <b>0.406</b> | 0.049        | 0.084        | 0.114     | -0.394        | 0.241        | 0.000        | -0.144        | -0.071        | <b>0.499</b> |
|                     | Spearman | <b>0.640</b> | <b>0.447</b> | <b>0.732</b> | <b>0.745</b> | -0.186    | -0.339        | <b>0.512</b> | <b>0.434</b> | <b>-0.456</b> | -0.353        | <b>0.754</b> |
| <i>blaSHV</i>       | Pearson  | <b>0.410</b> | 0.357        | 0.273        | 0.343        | 0.038     | -0.401        | 0.235        | 0.104        | -0.147        | -0.099        | <b>0.295</b> |
|                     | Spearman | <b>0.465</b> | 0.330        | <b>0.457</b> | <b>0.479</b> | -0.100    | -0.291        | 0.389        | 0.235        | -0.310        | -0.363        | <b>0.301</b> |
| <i>qnrA</i>         | Pearson  | <b>0.476</b> | <b>0.428</b> | -0.050       | -0.024       | 0.206     | <b>-0.569</b> | <b>0.304</b> | 0.287        | -0.218        | -0.106        | <b>0.752</b> |
|                     | Spearman | <b>0.556</b> | <b>0.405</b> | <b>0.640</b> | <b>0.646</b> | -0.099    | <b>-0.496</b> | <b>0.578</b> | <b>0.466</b> | <b>-0.527</b> | <b>-0.502</b> | <b>0.833</b> |
| <i>qnrB</i>         | Pearson  | <b>0.301</b> | <b>0.237</b> | 0.294        | 0.338        | -0.204    | -0.330        | 0.358        | <b>0.427</b> | -0.122        | -0.118        | <b>0.144</b> |
|                     | Spearman | <b>0.618</b> | <b>0.444</b> | <b>0.709</b> | <b>0.704</b> | -0.254    | -0.355        | 0.526        | <b>0.477</b> | -0.220        | -0.212        | <b>0.666</b> |
| <i>sul1</i>         | Pearson  | <b>0.497</b> | <b>0.443</b> | 0.072        | 0.120        | 0.117     | <b>-0.525</b> | 0.366        | 0.157        | -0.194        | -0.099        | <b>0.583</b> |
|                     | Spearman | <b>0.615</b> | <b>0.445</b> | <b>0.625</b> | <b>0.633</b> | 0.098     | <b>-0.520</b> | <b>0.567</b> | <b>0.505</b> | -0.401        | -0.168        | <b>0.774</b> |
| <i>sul2</i>         | Pearson  | <b>0.483</b> | <b>0.455</b> | 0.217        | 0.271        | 0.065     | -0.382        | 0.218        | 0.009        | -0.149        | -0.089        | <b>0.414</b> |
|                     | Spearman | <b>0.572</b> | <b>0.502</b> | <b>0.736</b> | <b>0.750</b> | -0.095    | -0.279        | 0.397        | 0.365        | -0.356        | -0.399        | <b>0.663</b> |
| <i>dfrA</i>         | Pearson  | <b>0.456</b> | <b>0.456</b> | 0.049        | 0.085        | 0.201     | <b>-0.419</b> | 0.160        | 0.017        | -0.158        | -0.080        | <b>0.577</b> |
|                     | Spearman | <b>0.531</b> | <b>0.444</b> | 0.697        | 0.709        | -0.164    | -0.367        | 0.415        | 0.354        | -0.382        | <b>-0.472</b> | <b>0.723</b> |
| <i>intI1</i>        | Pearson  | <b>0.517</b> | <b>0.442</b> | 0.014        | 0.048        | 0.136     | <b>-0.630</b> | 0.419        | 0.416        | -0.240        | -0.125        | <b>0.747</b> |
|                     | Spearman | <b>0.625</b> | <b>0.456</b> | <b>0.624</b> | <b>0.634</b> | 0.129     | <b>-0.511</b> | 0.543        | 0.527        | -0.407        | -0.133        | <b>0.786</b> |
| <i>intI2</i>        | Pearson  | <b>0.354</b> | 0.266        | -0.051       | -0.036       | 0.041     | <b>-0.534</b> | 0.280        | 0.407        | -0.204        | -0.101        | <b>0.604</b> |
|                     | Spearman | <b>0.568</b> | 0.384        | 0.648        | 0.654        | -0.123    | <b>-0.473</b> | <b>0.528</b> | <b>0.505</b> | <b>-0.482</b> | <b>-0.501</b> | <b>0.797</b> |
| <i>intI3</i>        | Pearson  | <b>0.487</b> | 0.388        | 0.094        | 0.131        | -0.026    | <b>-0.595</b> | 0.402        | <b>0.460</b> | -0.233        | -0.130        | <b>0.582</b> |
|                     | Spearman | <b>0.619</b> | 0.369        | <b>0.633</b> | <b>0.639</b> | 0.061     | <b>-0.512</b> | <b>0.587</b> | <b>0.521</b> | -0.396        | -0.196        | <b>0.721</b> |
| <i>oqxB</i>         | Pearson  | <b>0.541</b> | <b>0.440</b> | 0.057        | 0.095        | 0.104     | <b>-0.632</b> | <b>0.476</b> | <b>0.457</b> | -0.243        | -0.132        | <b>0.736</b> |
|                     | Spearman | <b>0.626</b> | <b>0.478</b> | <b>0.730</b> | <b>0.740</b> | -0.155    | -0.361        | <b>0.492</b> | <b>0.468</b> | <b>-0.513</b> | -0.398        | <b>0.805</b> |
| <i>16s rRNA</i>     | Pearson  | <b>0.488</b> | 0.359        | -0.054       | -0.035       | 0.031     | <b>-0.625</b> | <b>0.471</b> | <b>0.627</b> | -0.219        | -0.141        | <b>0.699</b> |
|                     | Spearman | <b>0.598</b> | 0.368        | <b>0.485</b> | <b>0.486</b> | 0.029     | <b>-0.580</b> | <b>0.522</b> | <b>0.534</b> | -0.331        | -0.237        | <b>0.848</b> |

Table S6. The p value of Pearson and Spearman analysis between water quality parameters and ARGs, integrons, and the 16S rRNA gene in the surface water.

|                     |          | <b>pH</b> | <b>Temperature</b> | <b>Conductivity</b> | <b>Salinity</b> | <b>Turbidity</b> | <b>DO</b> | <b>P-PO43-</b> | <b>N-NH4+</b> | <b>N-NO2-</b> | <b>N-NO3-</b> | <b>BOD5</b> |
|---------------------|----------|-----------|--------------------|---------------------|-----------------|------------------|-----------|----------------|---------------|---------------|---------------|-------------|
| <i>aac(6)-Ib-cr</i> | Pearson  | 0.0282    | 0.0279             | 0.9081              | 0.7773          | 0.3371           | 0.0347    | 0.4959         | 0.9527        | 0.4844        | 0.7300        | 0.0028      |
|                     | Spearman | 0.0007    | 0.0086             | 0.0000              | 0.0000          | 0.7406           | 0.0472    | 0.0120         | 0.0267        | 0.0466        | 0.1179        | 0.0000      |
| <i>blaCTX</i>       | Pearson  | 0.0148    | 0.0152             | 0.6007              | 0.4583          | 0.3246           | 0.0309    | 0.3541         | 0.7969        | 0.4538        | 0.6676        | 0.0029      |
|                     | Spearman | 0.0006    | 0.0124             | 0.0000              | 0.0000          | 0.4527           | 0.1616    | 0.0331         | 0.0310        | 0.0148        | 0.0196        | 0.0000      |
| <i>blaTEM</i>       | Pearson  | 0.0324    | 0.0491             | 0.8193              | 0.6959          | 0.5956           | 0.0568    | 0.2800         | 0.9999        | 0.5214        | 0.7415        | 0.0131      |
|                     | Spearman | 0.0008    | 0.0285             | 0.0000              | 0.0000          | 0.3840           | 0.1056    | 0.0148         | 0.0386        | 0.0331        | 0.0906        | 0.0000      |
| <i>blaSHV</i>       | Pearson  | 0.0468    | 0.0871             | 0.1972              | 0.1012          | 0.8599           | 0.0520    | 0.2927         | 0.6366        | 0.5139        | 0.6468        | 0.1616      |
|                     | Spearman | 0.0220    | 0.1150             | 0.0249              | 0.0179          | 0.6420           | 0.1682    | 0.0735         | 0.2801        | 0.1603        | 0.0816        | 0.1533      |
| <i>qnrA</i>         | Pearson  | 0.0186    | 0.0370             | 0.8151              | 0.9118          | 0.3347           | 0.0037    | 0.1694         | 0.1847        | 0.3302        | 0.6219        | 0.0000      |
|                     | Spearman | 0.0048    | 0.0495             | 0.0008              | 0.0007          | 0.6449           | 0.0137    | 0.0049         | 0.0249        | 0.0118        | 0.0125        | 0.0000      |
| <i>qnrB</i>         | Pearson  | 0.1530    | 0.2645             | 0.1628              | 0.1061          | 0.3394           | 0.1154    | 0.1019         | 0.0423        | 0.5874        | 0.5829        | 0.5016      |
|                     | Spearman | 0.0013    | 0.0299             | 0.0001              | 0.0001          | 0.2312           | 0.0886    | 0.0120         | 0.0213        | 0.3260        | 0.3196        | 0.0004      |
| <i>sulI</i>         | Pearson  | 0.0135    | 0.0302             | 0.7396              | 0.5765          | 0.5868           | 0.0085    | 0.0936         | 0.4733        | 0.3876        | 0.6452        | 0.0028      |
|                     | Spearman | 0.0014    | 0.0292             | 0.0011              | 0.0009          | 0.6478           | 0.0091    | 0.0059         | 0.0140        | 0.0640        | 0.4331        | 0.0000      |
| <i>sul2</i>         | Pearson  | 0.0169    | 0.0254             | 0.3084              | 0.2003          | 0.7621           | 0.0654    | 0.3295         | 0.9664        | 0.5092        | 0.6802        | 0.0441      |
|                     | Spearman | 0.0035    | 0.0125             | 0.0000              | 0.0000          | 0.6595           | 0.1876    | 0.0674         | 0.0872        | 0.1036        | 0.0533        | 0.0004      |
| <i>dfrA</i>         | Pearson  | 0.0250    | 0.0253             | 0.8210              | 0.6927          | 0.3458           | 0.0415    | 0.4760         | 0.9388        | 0.4821        | 0.7118        | 0.0032      |
|                     | Spearman | 0.0075    | 0.0296             | 0.0002              | 0.0001          | 0.4429           | 0.0775    | 0.0548         | 0.0977        | 0.0791        | 0.0198        | 0.0001      |
| <i>intI1</i>        | Pearson  | 0.0097    | 0.0306             | 0.9485              | 0.8236          | 0.5249           | 0.0010    | 0.0522         | 0.0481        | 0.2822        | 0.5603        | 0.0000      |
|                     | Spearman | 0.0011    | 0.0252             | 0.0011              | 0.0009          | 0.5490           | 0.0107    | 0.0091         | 0.0098        | 0.0600        | 0.5354        | 0.0000      |
| <i>intI2</i>        | Pearson  | 0.0897    | 0.2086             | 0.8115              | 0.8666          | 0.8482           | 0.0072    | 0.2062         | 0.0538        | 0.3625        | 0.6393        | 0.0018      |
|                     | Spearman | 0.0038    | 0.0640             | 0.0006              | 0.0005          | 0.5654           | 0.0195    | 0.0116         | 0.0140        | 0.0232        | 0.0127        | 0.0000      |
| <i>intI3</i>        | Pearson  | 0.0158    | 0.0611             | 0.6627              | 0.5433          | 0.9042           | 0.0022    | 0.0634         | 0.0272        | 0.2957        | 0.5435        | 0.0029      |
|                     | Spearman | 0.0013    | 0.0763             | 0.0009              | 0.0008          | 0.7775           | 0.0106    | 0.0041         | 0.0108        | 0.0682        | 0.3596        | 0.0001      |
| <i>oqxB</i>         | Pearson  | 0.0064    | 0.0316             | 0.7911              | 0.6580          | 0.6288           | 0.0009    | 0.0250         | 0.0282        | 0.2752        | 0.5377        | 0.0000      |
|                     | Spearman | 0.0011    | 0.0180             | 0.0001              | 0.0000          | 0.4702           | 0.0829    | 0.0201         | 0.0242        | 0.0146        | 0.0539        | 0.0000      |
| <i>16s rRNA</i>     | Pearson  | 0.0156    | 0.0851             | 0.8028              | 0.8715          | 0.8860           | 0.0011    | 0.0271         | 0.0014        | 0.3275        | 0.5101        | 0.0001      |
|                     | Spearman | 0.0021    | 0.0771             | 0.0162              | 0.0160          | 0.8941           | 0.0030    | 0.0127         | 0.0087        | 0.1318        | 0.2640        | 0.0000      |
